# Supplementary material for: Room temperature synthesis of CuInS2 nanocrystals
Source: Royal Society of Chemistry journal article supplement (doi:10.1039/c6ra22813e), 2016-01-01
Supplement: c6ra22813e1.pdf [file c6ra22813e1.pdf]

## Electronic Supplementary Information

### Room temperature synthesis of CuInS<sub>2</sub> nanocrystals

Christine Buchmaier,<sup>a</sup> Thomas Rath,<sup>a,\*</sup> Franz Pirolt,<sup>a</sup> Astrid-Caroline Knall,<sup>a</sup> Petra Kaschnitz,<sup>a</sup> Otto Glatter,<sup>a</sup> Karin Wewerka,<sup>b</sup> Ferdinand Hofer,<sup>b</sup> Birgit Kunert,<sup>c</sup> Kurt Krenn<sup>d</sup> and Gregor Trimmel<sup>a</sup>

a) Institute for Chemistry and Technology of Materials (ICTM), NAWI Graz, Graz University of Technology, Stremayrgasse 9, 8010 Graz, Austria

b) Institute for Electron Microscopy and Nanoanalysis, Graz University of Technology & Centre for Electron Microscopy Graz, Steyrergasse 17, 8010 Graz, Austria

c) Institute of Solid State Physics, Graz University of Technology, Petersgasse 16, 8010 Graz, Austria

d) Institute of Earth Sciences, University of Graz, Universitätsplatz 2, 8010 Graz, Austria

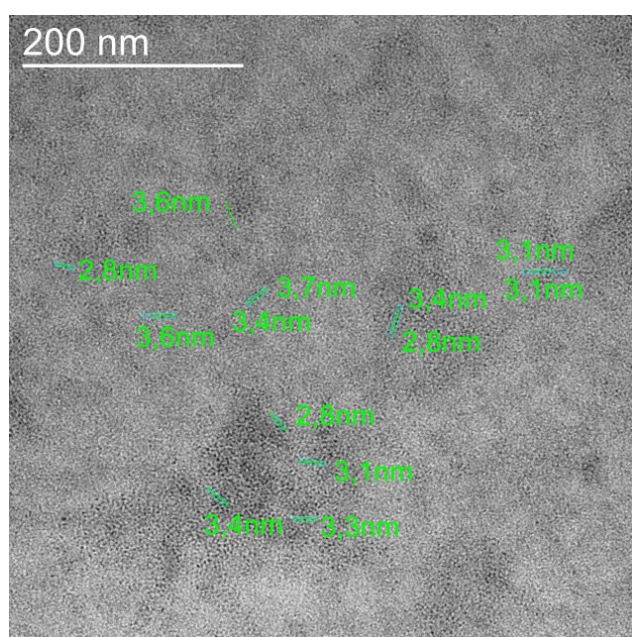

**Fig. S1** TEM image of the synthesized CuInS<sub>2</sub> nanocrystals and corresponding particle sizes.

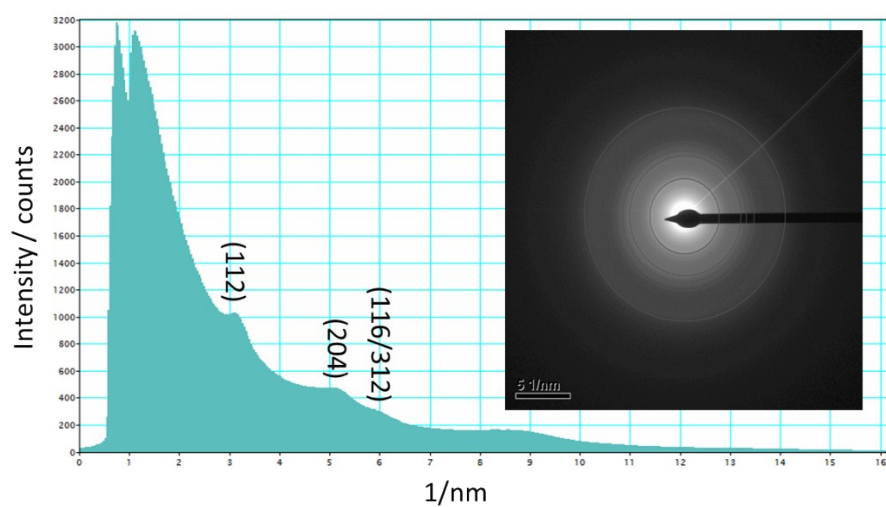

**Fig. S2** SAED pattern and the corresponding radial intensity profile of the CuInS<sub>2</sub> nanocrystals.

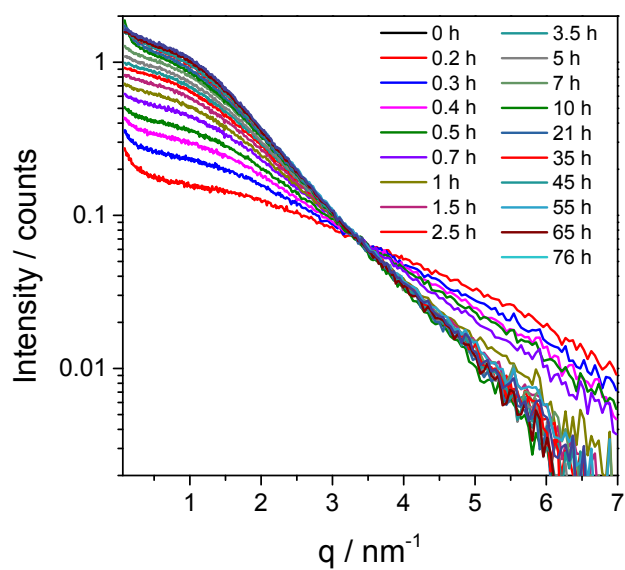

**Fig. S3** SAXS data of a time resolved measurement during a synthesis performed directly in the measurement capillary.

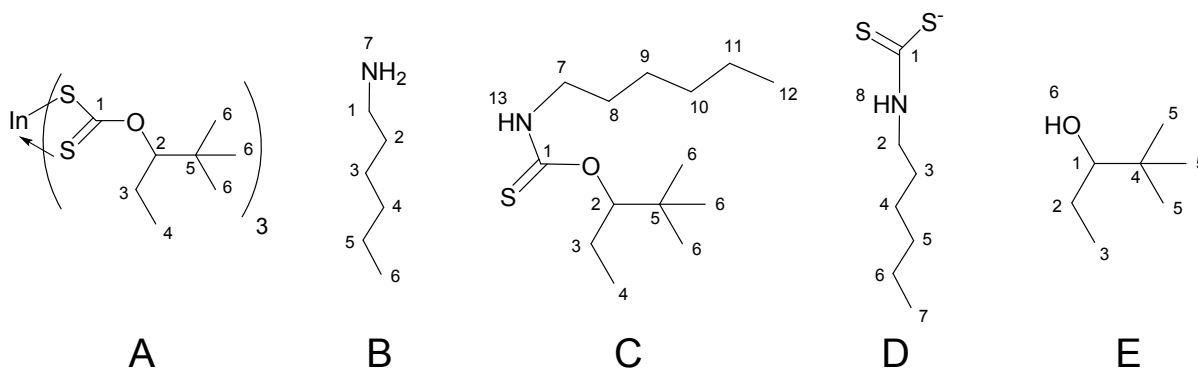

**Fig. S4** Chemical structures of educts (indium xanthate A, hexylamine B) and reaction products (thiocarbamate C, dithiocarbamate D, alcohol E) and labelling of the carbon/hydrogen atoms used in Tables S1 and S2.

**Table S1**  $^1\text{H}$  NMR spectroscopic data – indium xanthate/hexylamine model reaction

| In xanthate<br>(A) [ppm] | hexylamine<br>(B) [ppm] | thiocarbamate<br>isomers (C) [ppm] | dithiocarbamate<br>(D) [ppm] | alcohol<br>(E) [ppm] |
|--------------------------|-------------------------|------------------------------------|------------------------------|----------------------|
| A2: 4.75 ( t ; 1H )      | B1: 2.68 ( t ; 2H )     | C2: 5.36 ( dd )                    | D2: 3.45 ( t )               | E1: 3.10 ( dd; 1H )  |
| A3: 1.76 ( m ; 2H )      | B2: 1.44 ( m ; 2H )     | C3: 1.72; 1.53                     | D3: 1.64                     | E2: 1.22 ( m ; 1H )  |
| A4: 1.02 ( t ; 3H )      | B3: 1.29 ( br ; 2H )    | C4: 0.98                           | D4: 1.30                     | 1.56 ( m ; 1H )      |
| A6: 0.99 ( s ; 9H )      | B4: 1.29 ( br ; 2H )    | C6: 0.98; 0.92                     | D5: 1.30                     | E3: 0.99 ( t ; 3H )  |
|                          | B5: 1.29 ( br ; 2H )    | C7: 3.30; 3.58                     | D6: 1.30                     | E5: 0.87 ( s ; 9H )  |
|                          | B6: 0.89 ( t ; 3H )     | C8: 1.60; 1.50                     | D7: 0.90                     | E6: 1.51 ( s ; 1H )  |
|                          | B7: 1.07 ( br ; 2H )    | C9: 1.30                           | D8: 7.69 ( br )              |                      |
|                          |                         | C10: 1.30                          |                              |                      |
|                          |                         | C11: 1.30                          |                              |                      |
|                          |                         | C12: 0.89                          |                              |                      |
|                          |                         | C13: 6.80; 6.30                    |                              |                      |

**Table S2**  $^{13}\text{C}$  NMR spectroscopic data – indium xanthate/hexylamine model reaction

| In xanthate<br>(A) [ppm] | hexylamine<br>(B) [ppm] | thiocarbamate<br>isomers (C) [ppm] | dithiocarbamate<br>(D) [ppm]                       | alcohol<br>(E) [ppm] |
|--------------------------|-------------------------|------------------------------------|----------------------------------------------------|----------------------|
| A1: 230.9                | B1: 42.4                | C1: 191.7; 190.9                   | D1: 205.2                                          | E1: 81.8             |
| A2: 103.2                | B2: 34.0                | C2: 90.7; 88.1                     | D2: 51.1                                           | E2: 24.3             |
| A3: 23.5                 | B3: 26.7                | C3: 23.1; 23.3                     | D3: 27.8                                           | E3: 11.6             |
| A4: 11.1                 | B4: 31.8                | C4: 11.0; 11.2                     |                                                    | E4: 35.0             |
| A5: 36.2                 | B5: 22.7                | C5: 35.9; 35.4                     | other peaks are<br>overlapping with<br>C, B, and E | E5: 25.8             |
| A6: 26.1                 | B6: 14.1                | C6: 26.2; 26.5                     |                                                    |                      |
|                          |                         | C7: 45.3; 43.1                     |                                                    |                      |
|                          |                         | C8: 29.3; 28.7                     |                                                    |                      |
|                          |                         | C9: 26.5                           |                                                    |                      |
|                          |                         | C10: 31.5                          |                                                    |                      |
|                          |                         | C11: 22.6                          |                                                    |                      |
|                          |                         | C12: 14.0                          |                                                    |                      |

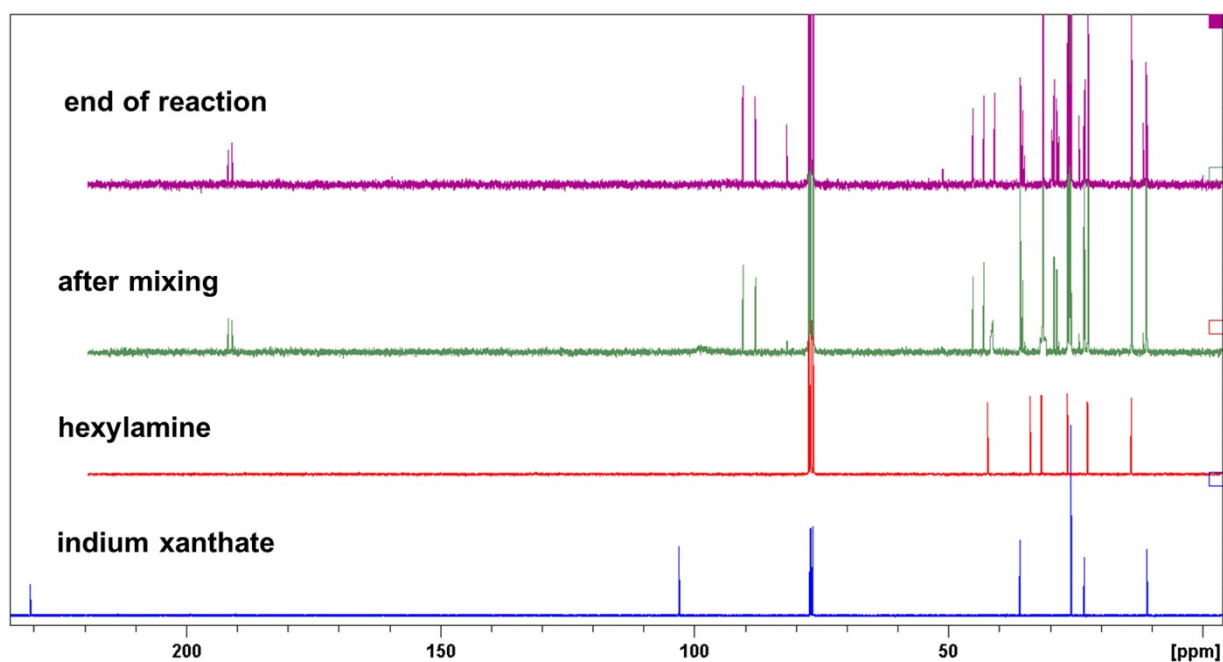

**Fig. S5**  $^{13}\text{C}$  NMR spectra of the pure educts indium xanthate and hexylamine, and spectra of the reaction shortly after mixing and at the end of the reaction (corresponding  $^1\text{H}$  NMR spectra can be found in the main text of the article).

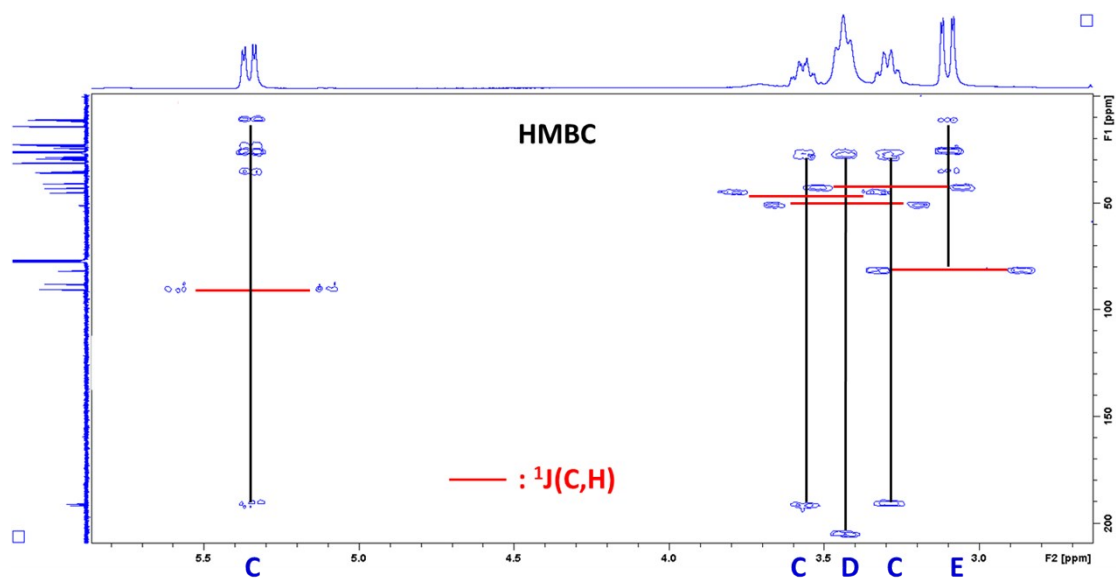

**Fig. S6** Heteronuclear Multiple Bond Correlation (HMBC) NMR spectrum ( $^{13}\text{C}$ ,  $^1\text{H}$ ) used for the identification of the reaction products by visualization of long-range couplings.

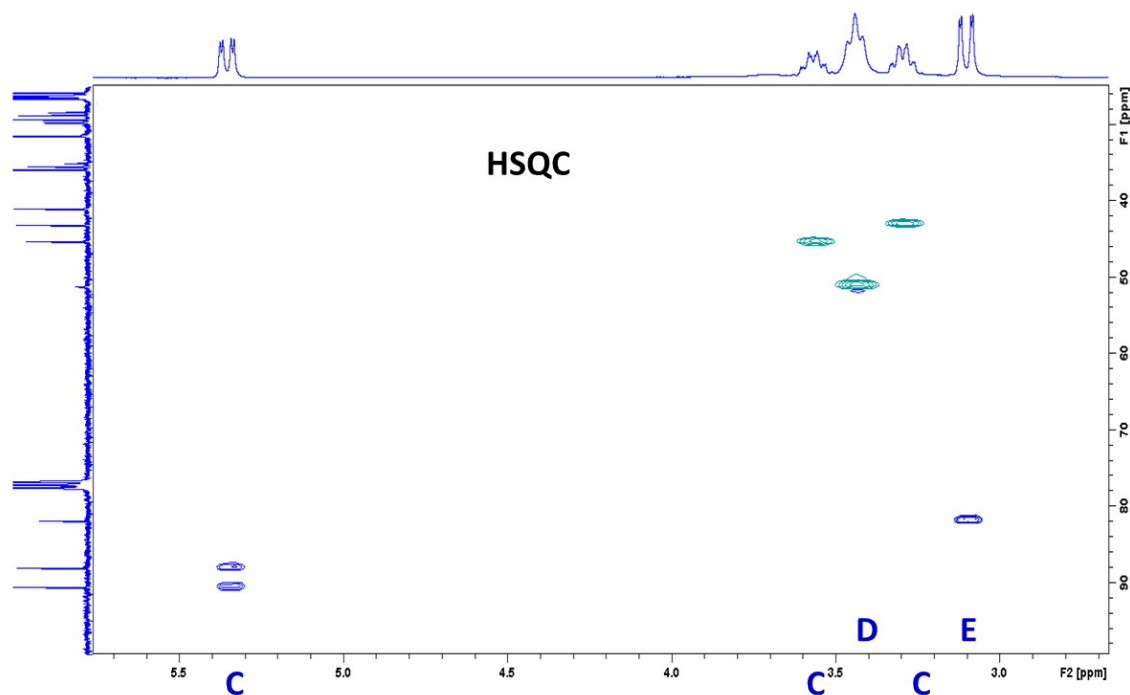

**Fig. S7** Heteronuclear Single Quantum Coherence (HSQC) NMR spectrum ( $^{13}\text{C}$ ,  $^1\text{H}$ ) used for the identification of the reaction products by visualization of direct  $^1\text{H}$ - $^{13}\text{C}$  coupling.

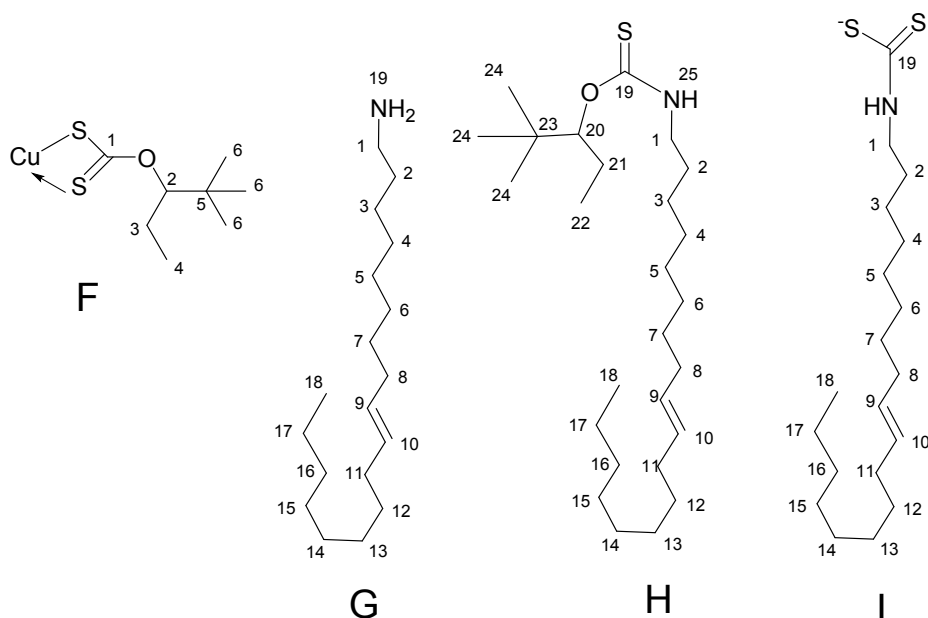

**Fig. S8** Chemical structures of educts (copper xanthate F, oleylamine G) and reaction products (thiocarbamate H, dithiocarbamate I, alcohol E) and labelling of the carbon/hydrogen atoms used in Tables S3 and S4.

**Table S3** <sup>1</sup>H NMR spectroscopic data - Cu/In xanthates - oleylamine

| Cu xanthate (F) [ppm]                                                                        | Cu/In xanthate* (A/F) [ppm]                                                    | oleylamine (G) [ppm]                                                                                                                                                                                     | thiocarbamate isomers (H) [ppm]                                                                                                                                       | dithiocarbamate (I) [ppm]                                                                                                |
|----------------------------------------------------------------------------------------------|--------------------------------------------------------------------------------|----------------------------------------------------------------------------------------------------------------------------------------------------------------------------------------------------------|-----------------------------------------------------------------------------------------------------------------------------------------------------------------------|--------------------------------------------------------------------------------------------------------------------------|
| F2: 5.24 ( t ; 1H )<br>F3: 1.73 ( m ; 2H )<br>F4: 0.93 ( t ; 3H )<br><br>F6: 0.95 ( s ; 9H ) | AF2: 5.04 ( t ; 1H )<br>AF3: 1.72 ( m ; 2H )<br>AF4,6: 1.00 – 0.95 (bs : 12 H) | G1: 2.64 ( t ; 2H )<br>G2: 1.40 ( m, 2H )<br>G3,4,5,6,7,12,13,14,15,16,17: 1.35-1,15 ( m, 22H )<br>G8/11: 1.99 ( m ; 4H )<br><br>G9/10: 5.32 ( m ; 2H )<br>G18: 0.85 ( t ; 3H )<br>G19: 1.03 ( bs ; 2H ) | H25: 6.78; 6.28<br>H1: 3.27; 3.55<br>H20: ~5.36 ( ** )<br><br>all other peaks are overlapping with peaks stemming from oleylamine G, dithiocarbamate I, and alcohol E | H1: 3.46<br><br><br>all other peaks are overlapping with peaks stemming from oleylamine G, thiocarbamate H and alcohol E |

\* peaks observed during reaction (reaction time 10 min)

\*\* peak overlaid by oleylamine G9/10 protons

**Table S4** <sup>13</sup>C NMR spectroscopic data - Cu/In xanthates – oleylamine

| Cu xanthate (F) [ppm]                                                         | Cu/In xanthate* (A/F) [ppm]                                                       | oleylamine** (G) [ppm]                                                                                                                                                  | thiocarbamate isomers (H) [ppm]                                                                                  | dithiocarbamate (I) [ppm]                                                        |
|-------------------------------------------------------------------------------|-----------------------------------------------------------------------------------|-------------------------------------------------------------------------------------------------------------------------------------------------------------------------|------------------------------------------------------------------------------------------------------------------|----------------------------------------------------------------------------------|
| F1: 230.4<br>F2: 98.9<br><br>F3: 23.5<br>F4: 11.3<br>F5: 36.6<br><br>F6: 26.2 | AF1: 230 (b)<br>AF2: 98 (b)<br><br>AF3: 23<br>AF4: 11<br>AF5: 36.5<br><br>AF6: 26 | G1: 41.9<br>G2: 33.2<br>G9/10: 130.0, 129.8<br>G17: 22.6<br>G18: 14.0<br>G3-8, G11-16: 31.9, 29.8, 29.75, 29.72, 29.67, 29.58, 29.46, 29.33, 29.31, 29.25, 27.27, 26.11 | C19: 191.8 ; 191.0<br>C20: 90.5 ; 88.9<br>C1: 45.3 ; 43.1<br><br>all other peaks are overlapping with G, I and F | C19: 206 (br)<br>C1: 51.5<br><br>all other peaks are overlapping with G, H and F |

\* peaks observed during the reaction (reaction time 10 min)

\*\* main peaks, additional small peaks by small amounts of isomers and byproducts

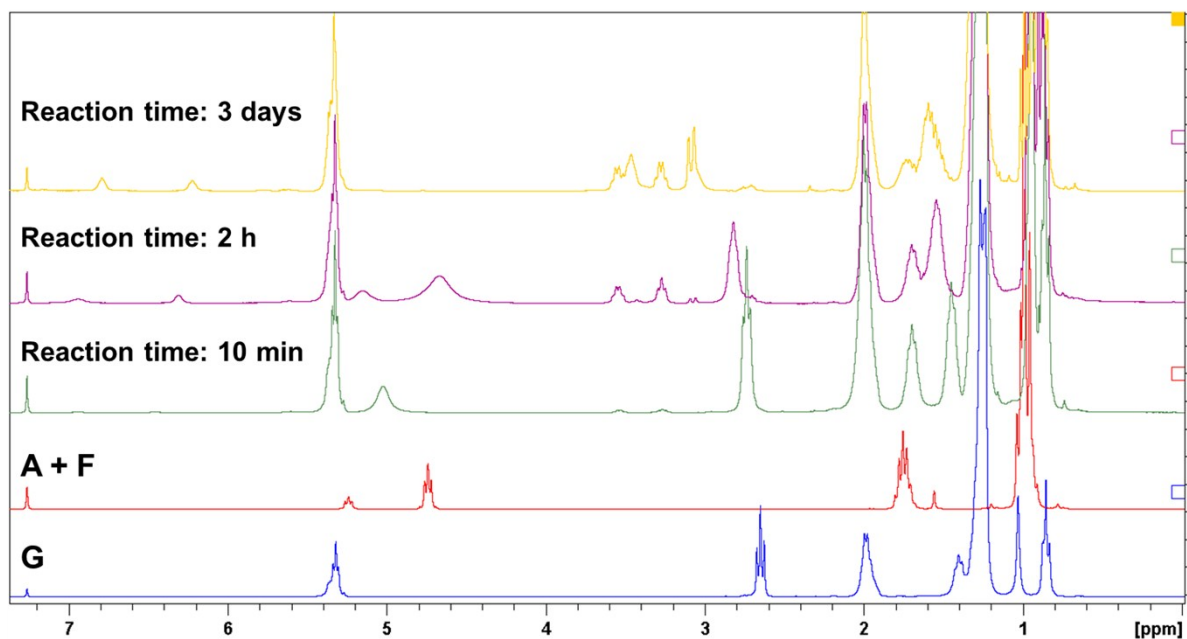

**Fig. S9**  $^1\text{H}$  NMR spectra of oleylamine (G), a mixture of indium and copper xanthate (A + F) and of the reaction mixture comprising of the metal xanthates and oleylamine after different reaction times.

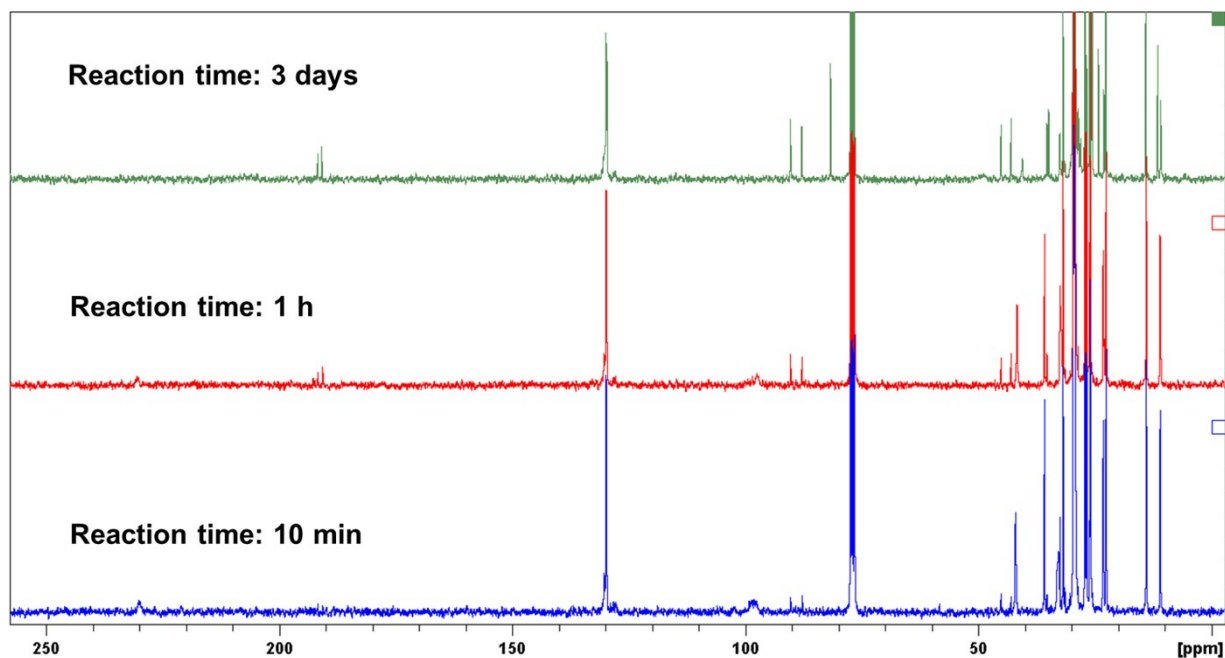

**Fig. S10**  $^{13}\text{C}$  NMR spectra of the reaction mixture (metal xanthates and oleylamine) after different reaction times.
